# Supplementary material for: What Is the Role of a Specialist Assessment Clinic for FND? Lessons From Three National Referral Centers
Source: Atypon-hosted journal article supplement (doi:10.1176/appi.neuropsych.19040083), 2019-10-07
Supplement: appi.neuropsych.19040083.ds001.pdf [file appi.neuropsych.19040083.ds001.pdf]

## Supplementary Table

**Table S1**

| <b>Final diagnosis when not FND in the Swiss cohort</b> | <b>119</b> |
|---------------------------------------------------------|------------|
| somatic symptom disorder (with pain)                    | 20 (17%)   |
| chronic pain or chronic headache                        | 36 (30%)   |
| chronic headache                                        | 19 (16%)   |
| fatigue                                                 | 6 (5%)     |
| other psychiatric diagnosis                             | 17 (14%)   |
| medically unexplained neurological complaint            | 21 (18%)   |
